# Supplementary material
Source: publisher site journal article supplement (https://www.dovepress.com/article/124710)
Supplement: Supplementary file 1 [file get_supplementary_file.php%3Ff%3D124710.pdf]

# Survey Questionnaire

## **1 Demographic Information**

1.1 Age (years)

☐ 18-30   ☐ 31-40   ☐ 41-50   ☐ 51-60   ☐ 61-70   ☐ 71-80   ☐ 81-90   ☐ 90+

1.2 Sex

☐ Female   ☐ Male   ☐ Prefer not to say

1.3 Region of residence

☐ Australia   ☐ North America   ☐ South America   ☐ Europe

☐ Asia   ☐ Africa   ☐ New Zealand

☐ Other (please specify)

1.4 What is your marital status?

☐ Married   ☐ Partnered   ☐ Unmarried   ☐ Single   ☐ Prefer not to say

1.5 Level of education

☐ Primary   ☐ Secondary   ☐ Tertiary

☐ Post graduate   ☐ Other education

1.6 What best describes your current work status?

☐ Full time paid employment   ☐ Part time paid employment

☐ Unemployed due to pain   ☐ Unemployed (not pain related)   ☐ Home duties

☐ On leave from work due to pain   ☐ Studying   ☐ Prefer not to say

## **2 Medical History**

2.1 Have you received any of the following diagnosis for your current pain problem (tick all that apply)?

☐ Osteoarthritis   ☐ Rheumatoid arthritis   ☐ Fibromyalgia

☐ Chronic Fatigue   ☐ Chronic widespread pain   ☐ Lower back pain

☐ Neck pain   ☐ Migraines   ☐ Headaches

☐ Pelvic pain   ☐ No specific diagnosis but experience pain

☐ No specific musculoskeletal pain   ☐ Other (please specify)

2.2 Do you take any of the following supplements *for your current pain problem?* (tick all that apply)

☐ Calcium   ☐ Vitamin D   ☐ Fish oil   ☐ Magnesium   ☐ Multivitamin

☐ Ayurveda medicines   ☐ Chinese medicine   ☐ Herbal medicines   ☐ none

☐ Other   ☐ please specify

2.3 Do you take any of the following supplements *for any other reason?*

☐ Calcium   ☐ Vitamin D   ☐ Fish oil   ☐ Magnesium   ☐ Multivitamin

☐ Ayurveda medicines   ☐ Chinese medicine   ☐ Herbal medicines   ☐ none

☐ Other   ☐ please specify

2.4 Do you take any of the following supplements *because you were advised by a health care professional to do so?*

☐ Calcium   ☐ Vitamin D   ☐ Fish oil   ☐ Magnesium   ☐ Multivitamin

☐ Ayurveda medicines   ☐ Chinese medicine   ☐ Herbal medicines   ☐ not applicable

☐ Other   ☐ please specify

2.5 Have you ever been tested for Vitamin D levels?

☐ Yes   ☐ No

2.6 If yes, have your test results for Vitamin D ever been deficient?

☐ Yes   ☐ No   ☐ not applicable

2.7 If yes, have you ever been told that it may contribute to your current pain problem?

☐ Yes   ☐ No   ☐ not applicable

## **3 The Pain Questionnaire**

3.1 Was your current pain problem triggered by an injury?

☐ Yes   ☐ No

3.2 How long has the pain been present?

☐ 3   ☐ 3- 6 months   ☐ 6- 12 months   ☐ More than 1 year

3.3 What best describes the character of your pain? (tick all that apply)

☐ Aching   ☐ Burning   ☐ Cold   ☐ Electric shocks   ☐ Dull   ☐ Hot   ☐ Flushed   ☐

Lightning-like   ☐ Tingling   ☐ Numb   ☐ Pins & Needles   ☐ Sharp

☐ Stabbing   ☐ Throbbing   ☐ Ants crawling   ☐ other   ☐ Please specify

3.4 Over the past 2 days what's the average severity of your pain on a scale of 1-10

(0= no pain, 10 = severe/ worst pain)

☐0 ☐1 ☐2 ☐3 ☐4 ☐5 ☐6 ☐7 ☐8 ☐9 ☐10

#### **4. Pain experience**

4.1 How well do you understand the cause of your pain?

(0 = I do not understand at all, 5 = I understand very well)

☐0 ☐1 ☐2 ☐3 ☐4 ☐5

4.2 Have you received any education about your pain?

☐ Yes ☐ No

4.3 If yes, was this education provided in person by any of the following professional? (tick all that apply)

☐ General Practitioner ☐ Nurse Practitioner ☐ Pain Physician ☐ Physiotherapist

☐ Chiropractor ☐ Massage therapist ☐ Pharmacist ☐ Not applicable

☐ other (please specify) ☐ Not applicable

4.4 Have you been referred to any of the following types of education material about pain?

☐ Book ☐ Website ☐ video ☐ YouTube ☐ Audio book ☐ Smart phone App ☐ Pamphlets/Brochure

☐ Not applicable

4.5 What type of education material was most helpful? Please rank them in order of preference from 1-5.

☐ Book ☐ Website ☐ video ☐ YouTube ☐ Audio book

☐ Smart phone App ☐ Pamphlets/Brochure ☐ Not applicable

4.6 How helpful was this education? (0= not helpful; 5= very helpful)

☐0 ☐1 ☐2 ☐3 ☐4 ☐5

4.7 Did the education change the way you think about your pain?

☐ Yes ☐ No

4.8 Did the education change the way you manage your pain?

☐ Yes ☐ No

4.9 Did you receive any information about your pain treatment options?

☐ Yes ☐ No

4.10 How helpful was this information? (0= not at all helpful; 5 = extremely helpful)

☐ 0 ☐ 1 ☐ 2 ☐ 3 ☐ 4 ☐ 5

4.11 How satisfied are you with your involvement in the health care decisions about your pain management? (0= not satisfied all, 5 = very satisfied)

☐0 ☐1 ☐2 ☐3 ☐4 ☐5

4.12 Regarding the most recent health care consultation (General Practitioner/Family doctor/ Physician) for your current pain problem, was the appointment duration?

☐Just right ☐ Too long ☐ Not long enough ☐ Not applicable

4.13 How frequent are your consultations with medical health professional (General Practitioner/Family doctor/ Physician)?

☐Just right ☐ Too frequent ☐ Not frequent ☐ Not applicable

4.14 Do you use any non-medicine methods to relieve your pain?

☐ Yes ☐No

4.15 If yes, which of the following methods have you used?

☐Cold pack ☐ Heat ☐ Massage ☐ Meditation ☐ Deep breathing ☐ Music ☐ Distraction (TV/reading)

☐ Prayer ☐ Relaxation ☐Imagery ☐Visualization ☐Walking ☐Movement ☐ Not applicable ☐ Other

☐ Other (please specify)

4.16 Which of the following above listed methods have you found helpful? Rank them in the order of preference from 1-5.

☐Cold pack ☐ Heat ☐ Massage ☐ Meditation ☐ Deep breathing ☐ Music ☐ Distraction (TV/reading)

☐ Prayer ☐ Relaxation ☐Imagery ☐Visualization ☐Walking ☐Movement ☐ Not applicable ☐ Other

4.17 At your last consultation where any of the above non-medication methods recommended as a way to relieve pain?

☐ Yes ☐No

4.18 At your last health care consultation, how did you feel? (tick all that apply)

☐Understood ☐Believed ☐Not taken seriously ☐Dismissed ☐Ignored

#### **5. Outcome expectation**

5.1 How long do you think it will take you to recover from your current pain problem?

☐ More than 3 months ☐ 3-6 months ☐ More than 6 months

☐ upto 1 year ☐ More than 1 year ☐ Never

5.2 What do you believe will help you achieve better treatment outcome?(tick all that apply)

☐More frequent doctor visits ☐Longer duration of doctor visits

☐More education about pain ☐ Practical strategies for managing pain

☐Learning to set realistic goals ☐More support from health care professionals

☐Having a team approach to management ☐ Training in self-management of pain

☐Education about your pain for your family member's

☐ Education about your pain for your employer

5.3 Please rank the above strategies you think will help you achieve better treatment outcome, in order of preference from 1-5.

- |                                                                             |                                                                      |
|-----------------------------------------------------------------------------|----------------------------------------------------------------------|
| <input type="checkbox"/> More frequent doctor visits                        | <input type="checkbox"/> Longer duration of doctor visits            |
| <input type="checkbox"/> More education about pain                          | <input type="checkbox"/> Practical strategies for managing pain      |
| <input type="checkbox"/> Learning to set realistic goals                    | <input type="checkbox"/> More support from health care professionals |
| <input type="checkbox"/> Having a team approach to management               | <input type="checkbox"/> Training in self-management of pain         |
| <input type="checkbox"/> Education about your pain for your family member's |                                                                      |
| <input type="checkbox"/> Education about your pain for your employer        |                                                                      |

5.4 What goals do you wish to achieve from your pain management? Rank in the order of preference from 1-5.

- |                                                        |                                                   |                                                   |
|--------------------------------------------------------|---------------------------------------------------|---------------------------------------------------|
| <input type="checkbox"/> Less Pain                     | <input type="checkbox"/> No pain                  | <input type="checkbox"/> Improved quality of life |
| <input type="checkbox"/> Improved movement             | <input type="checkbox"/> Improved activity levels | <input type="checkbox"/> Improved sleep           |
| <input type="checkbox"/> Improved mood                 | <input type="checkbox"/> Less stress              | <input type="checkbox"/> Going back to work       |
| <input type="checkbox"/> Increase in social activities | <input type="checkbox"/> other                    |                                                   |
